# Supplementary material for: Biomineralization-inspired: rapid preparation of a silicon-based composite as a high-performance lithium-ion battery anode
Source: Royal Society of Chemistry journal article supplement (doi:10.1039/d1ta01919h), 2021-01-01
Supplement: d1ta01919h1.pdf [file d1ta01919h1.pdf]

# Biomimetalization-Inspired: Rapid Preparation of Silicon-Based Composite as High-Performance Lithium-Ion Battery Anode

Runsheng Gao <sup>a,b</sup>, Jie Tang <sup>a,b,\*</sup>, Shuai Tang <sup>a</sup>, Kun Zhang <sup>a</sup>, Kiyoshi Ozawa <sup>a</sup>,  
Lu-Chang Qin <sup>c</sup>

<sup>a</sup> *National Institute for Materials Science, 1-2-1 Sengen, Tsukuba, Ibaraki 305-0047, Japan*

<sup>b</sup> *University of Tsukuba, 1-1-1 Tennodai, Tsukuba, Ibaraki 305-0006, Japan*

<sup>c</sup> *Department of Physics and Astronomy, University of North Carolina at Chapel Hill, Chapel Hill, NC 27599-3255, USA*

Corresponding author: Jie Tang, tang.jie@nims.go.jp

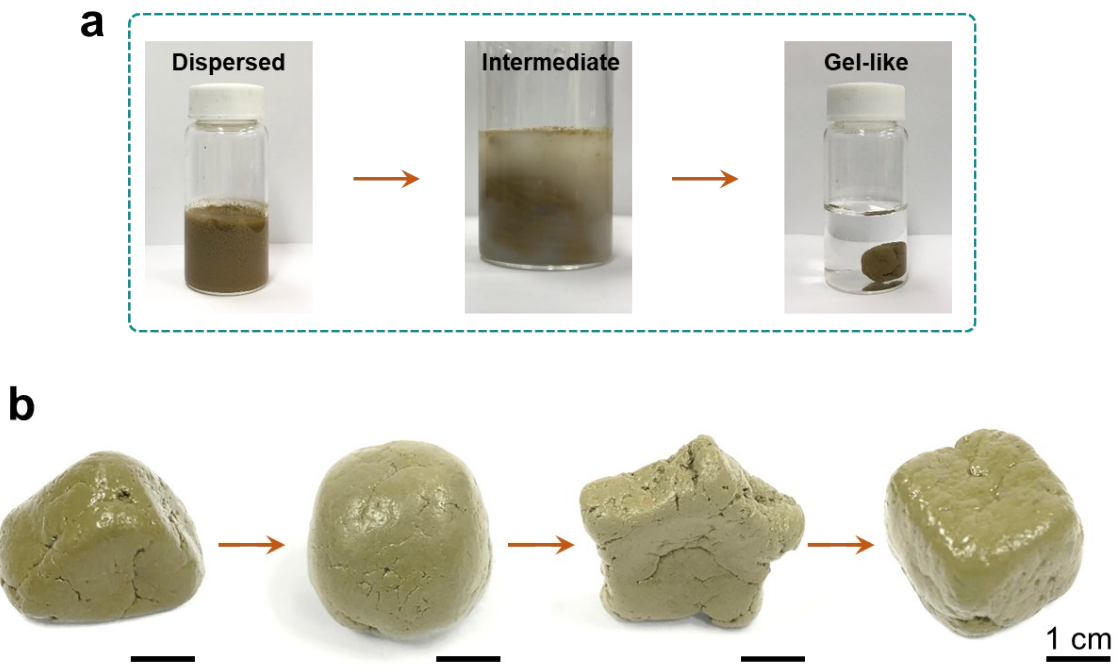

**Figure S1.** Optical images of (a) preparation procedure of gel-like composite and (b) Examples of editable shapes of gel-like composite.

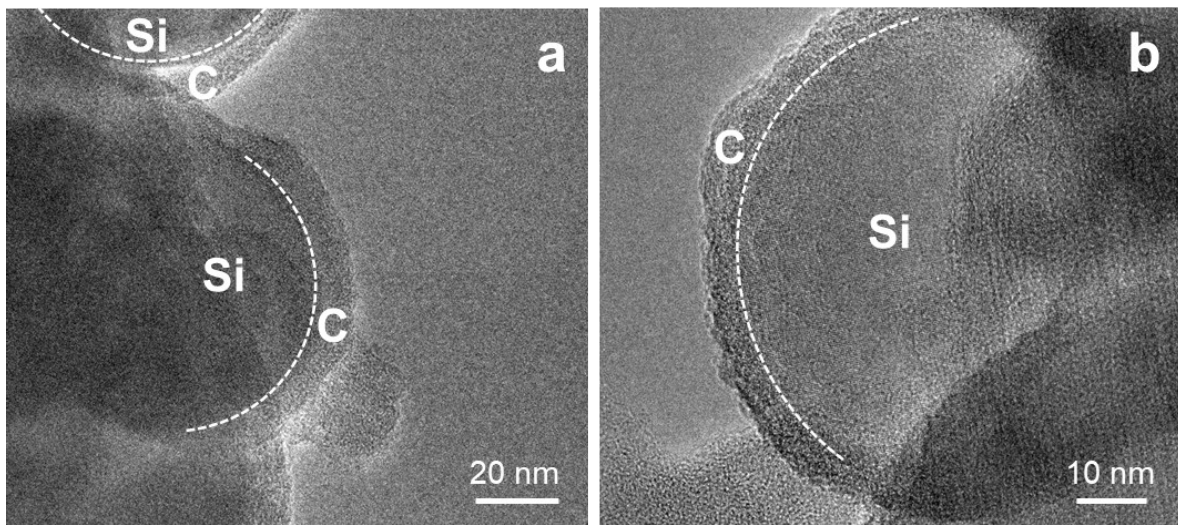

**Figure S2.** HRTEM images of n-Si@C composite with a carbon-coated structure.

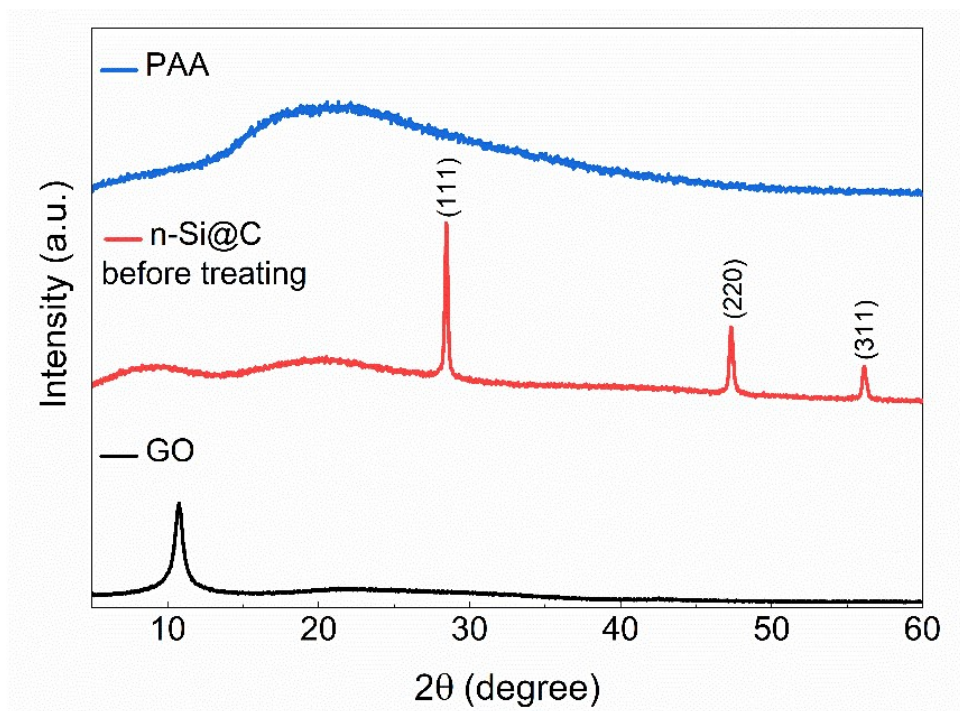

**Figure S3.** XRD patterns of GO, PAA, and n-Si@C composite before treatment.

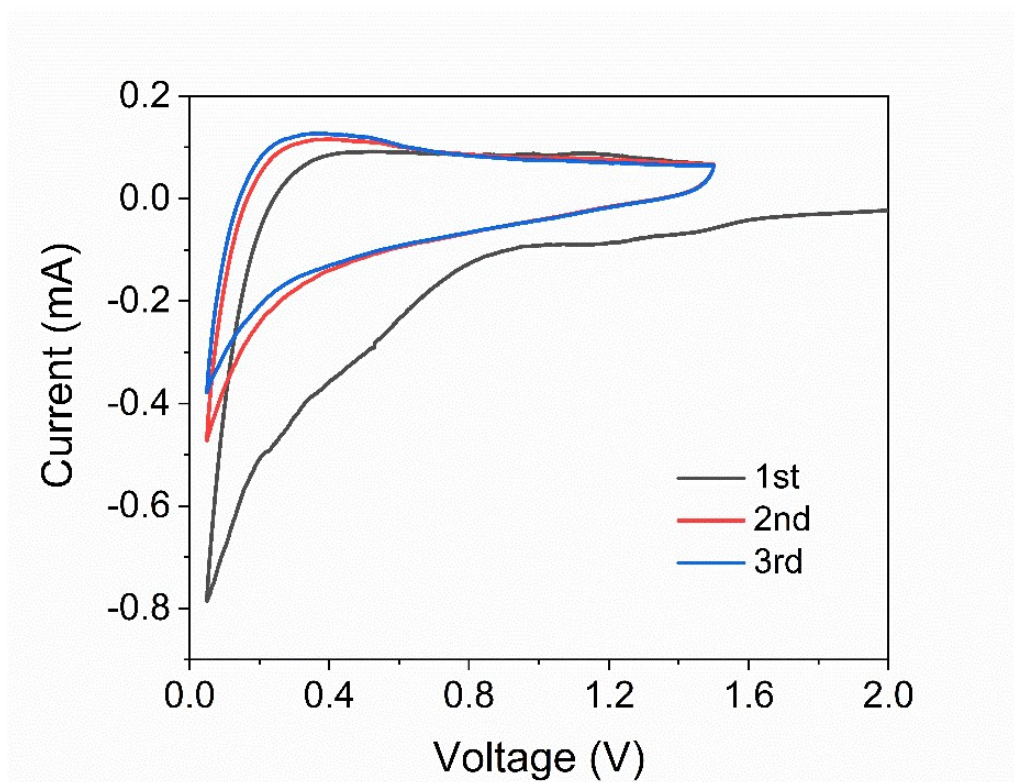

**Figure S4.** Cyclic voltammetry profiles with cutoff voltage of 0.01–1.5 V vs Li/Li<sup>+</sup> at scan rate of 0.1 mV s<sup>-1</sup>.

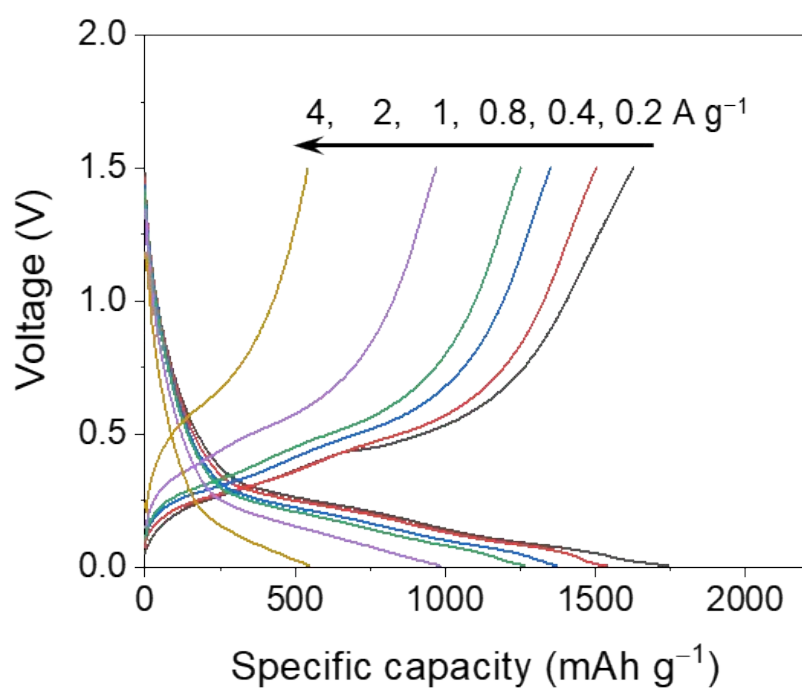

**Figure S5.** Lithiation-delithiation profiles of Si/C electrode under various current densities.

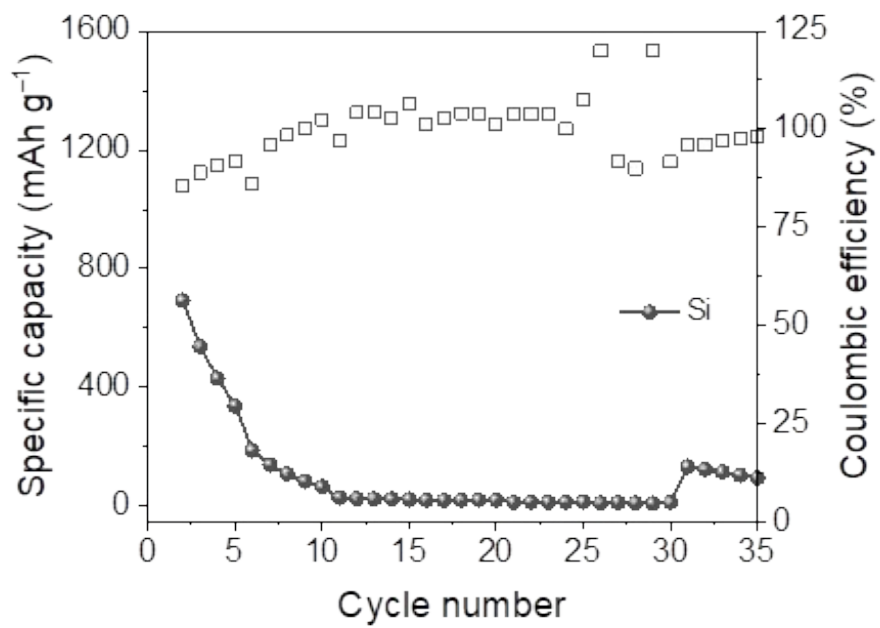

**Figure S6.** Rate capability of pure Si electrode.

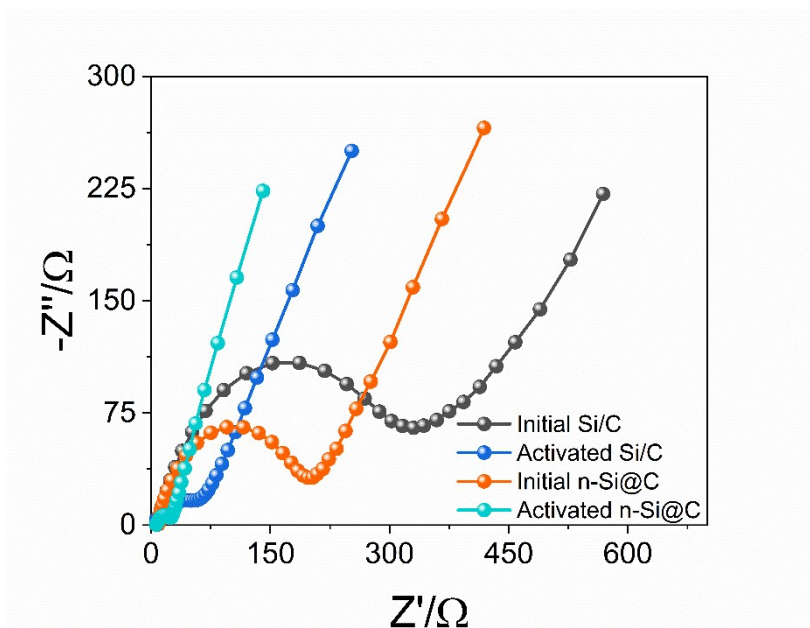

**Figure S7.** Nyquist plots of n-Si@C and Si/C electrode before and after activation.



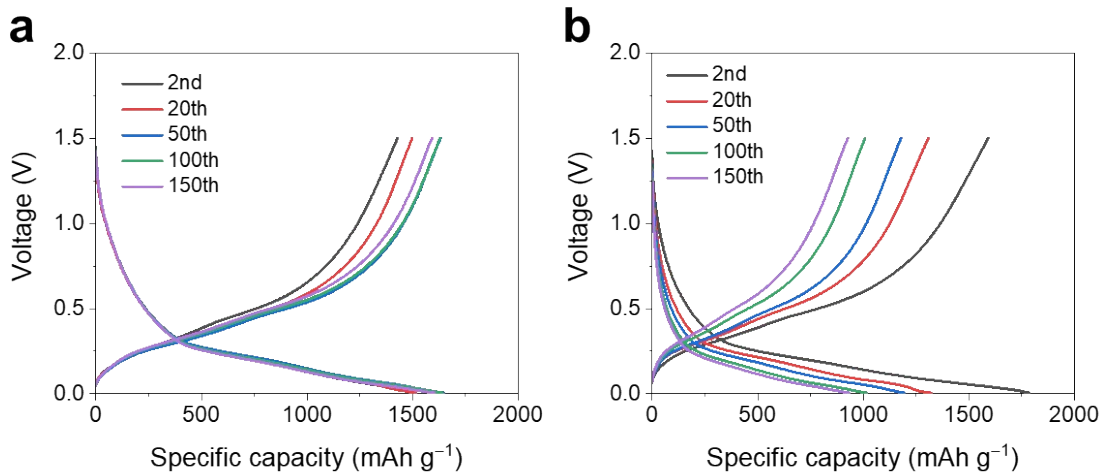

**Figure S8.** Charge-discharge curves of (a) n-Si@C and (b) Si/C electrode at 2<sup>nd</sup>, 20<sup>th</sup>, 50<sup>th</sup>, 100<sup>th</sup>, and 150<sup>th</sup> cycle.

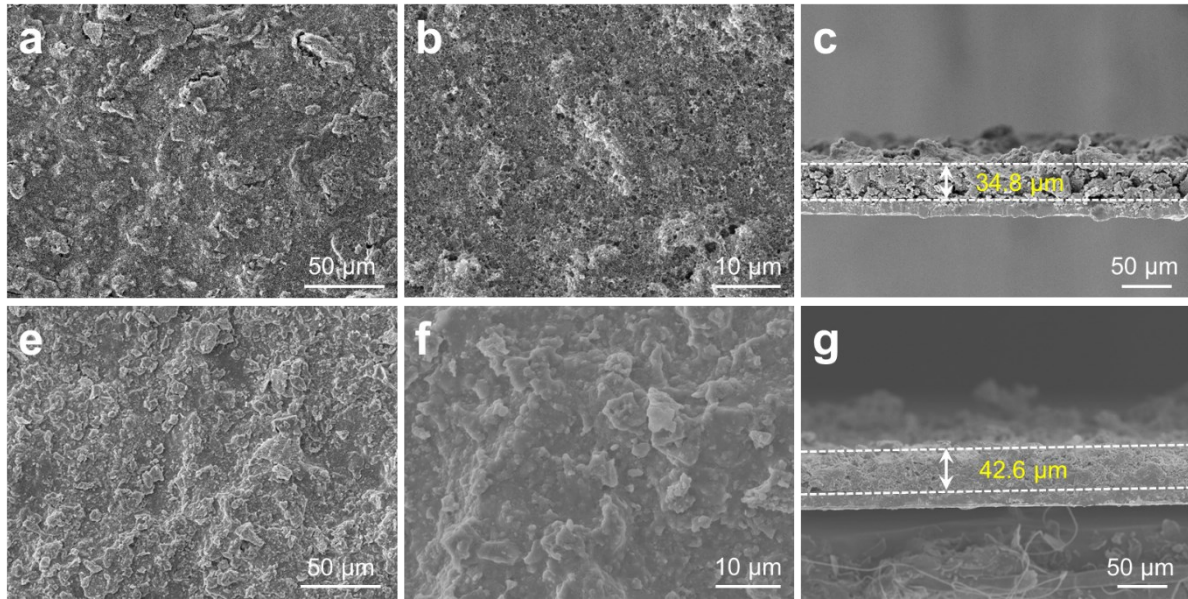

**Figure S9.** SEM images of n-Si@C composite electrode. Surface images of (a, b) before and (e, f) after 50 cycles. Cross-sectional images of (c) before and (g) after 50 cycles.

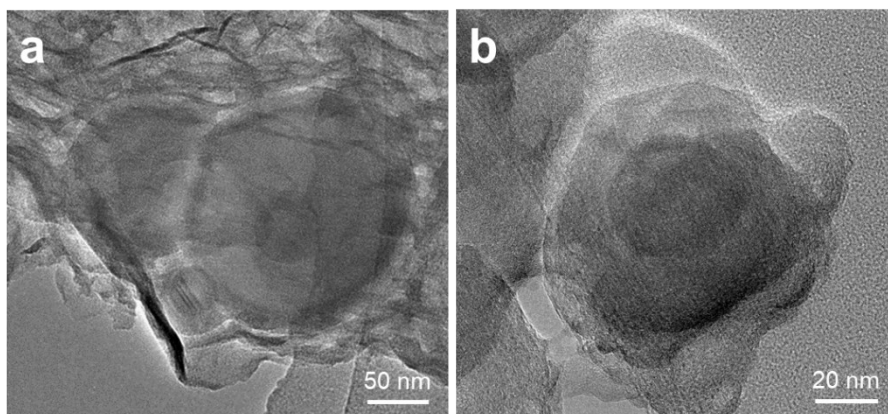

**Figure S10.** TEM images of Si nanoparticle before (a) and after (b) 50 cycles.

**Table S1.** Comparison of electrochemical performance of Si-based composites for LIBs.

| Electrode                             | Voltage(V )      | Current density (mA g <sup>-1</sup> ) | Cycle number | Capacity retention (mAh g <sup>-1</sup> ) | Ref.             |
|---------------------------------------|------------------|---------------------------------------|--------------|-------------------------------------------|------------------|
| Spherical Si/C                        | 0.01-3.0         | 200                                   | 400          | 1391                                      | 1                |
| 3D hierarchical Si/C                  | 0.005-3.0        | 200                                   | 300          | 710                                       | 2                |
| Si@CNT/C                              | 0.01-2.0         | 200                                   | 300          | 2056                                      | 3                |
| Mesocarbon microbeads @Si@C           | 0.001-1.5        | 200                                   | 100          | 632                                       | 4                |
| Plasma nano-Si@C                      | 0.01-1.5         | 100                                   | 200          | 966                                       | 5                |
| Si/C composite                        | 0.01-3.0         | 360                                   | 200          | 1545                                      | 6                |
| 3D network Si@SiO <sub>x</sub> /C     | 0.01-2.0         | 200                                   | 100          | 1362                                      | 7                |
| Hierarchical Graphene-Scaffolded Si/C | 0.005-1.5        | 372                                   | 300          | 445                                       | 8                |
| Metallic frameworks Si                | 0.01-1.2         | 500                                   | 100          | 1205                                      | 9                |
| MXene-Si-CNT                          | 0.01-1.5         | 500                                   | 200          | 1000                                      | 10               |
| Si@C@ZIF-67-800N                      | 0.01-1.5         | 1000                                  | 300          | 852                                       | 11               |
| SiFeCNT                               | 0.005-1.5        | 1000                                  | 300          | 1163                                      | 12               |
| SiO <sub>x</sub> /C                   | 0.005-2.0        | 1000                                  | 500          | 454                                       | 13               |
| Si/CNT                                | 0.005-1.5        | 1000                                  | 400          | 715                                       | 14               |
| <b>n-Si@C</b>                         | <b>0.005-1.5</b> | <b>500</b>                            | <b>150</b>   | <b>1606</b>                               | <b>This work</b> |
|                                       |                  | <b>1000</b>                           | <b>300</b>   | <b>1308</b>                               |                  |
|                                       |                  | <b>2000</b>                           | <b>600</b>   | <b>867</b>                                |                  |

## References

- 1 D. Wang, C. Zhou, B. Cao, Y. Xu, D. Zhang, A. Li, J. Zhou, Z. Ma, X. Chen and H. Song, *Energy Storage Mater.*, 2020, **24**, 312–318.
- 2 X. Zuo, X. Wang, Y. Xia, S. Yin, Q. Ji, Z. Yang, M. Wang, X. Zheng, B. Qiu and Z. Liu, *J. Power Sources*, 2019, **412**, 93–104.
- 3 H. Wang, J. Fu, C. Wang, J. Wang, A. Yang, C. Li, Q. Sun, Y. Cui and H. Li, *Energy Environ. Sci.*, 2020, **13**, 848–858.
- 4 Y. Lin, Y. Chen, Y. Zhang, J. Jiang, Y. He, Y. Lei, N. Du and D. Yang, *Chem. Commun.*, 2018, **54**, 9466–9469.
- 5 H. Chen, X. Hou, F. Chen, S. Wang, B. Wu, Q. Ru, H. Qin and Y. Xia, *Carbon*, 2018, **130**, 433–440.
- 6 Z. Hu, L. Zhao, T. Jiang, J. Liu, A. Rashid, P. Sun, G. Wang, C. Yan and L. Zhang, *Adv. Funct. Mater.* 2019, **29**, 1906548.
- 7 J. Lee, J. Moon, S. A. Han, J. Kim, V. Malgras, Y.-U. Heo, H. Kim, S.-M. Lee, H. K. Liu and S. X. Dou, *ACS Nano*, 2019, **13**, 9607–9619.
- 8 S. Zhu, J. Zhou, Y. Guan, W. Cai, Y. Zhao, Y. Zhu, L. Zhu, Y. Zhu and Y. Qian, *Small*, 2018, **14**, 1802457.
- 9 A. Zhang, Z. Fang, Y. Tang, Y. Zhou, P. Wu and G. Yu, *Nano Lett.*, 2019, **19**, 6292–6298.
- 10 S. Liu, X. Zhang, P. Yan, R. Cheng, Y. Tang, M. Cui, B. Wang, L. Zhang, X. Wang and Y. Jiang, *ACS Nano*, 2019, **13**, 8854–8864.
- 11 N. Liu, J. Liu, D. Jia, Y. Huang, J. Luo, X. Mamat, Y. Yu, Y. Dong and G. Hu, *Energy Storage Mater.*, 2019, **18**, 165–173.
- 12 C. Jo, A. S. Groombridge, J. De La Verpilliere, J. T. Lee, Y. Son, H.-L. Liang, A. M. Boies and M. De Volder, *ACS Nano*, 2019, **14**, 698–707.
- 13 R. Gao, J. Tang, X. Yu, K. Zhang, K. Ozawa and L.-C. Qin, *Electrochimica Acta*, 2020, **360**, 136958.
- 14 Z. Yi, N. Lin, Y. Zhao, W. Wang, Y. Qian, Y. Zhu and Y. Qian, *Energy Storage Mater.*, 2019, **17**, 93–100.
